# Supplementary material for: A Mendelian randomization study of daytime napping and inflammatory bowel disease
Source: Research Square preprint supplement (doi:10.21203/rs.3.rs-8516533/v1), 2026-02-10
Supplement: Supplementary file 1 [file 5d2ba81a990bc65146c6e17c.xlsx]

## Sheet: S1
Table S1. The candidate SNPs for MR analysis
SNP	REF	ALT	beta	se	P	eaf	F
rs13284688	T	C	0.0144228	0.00151104	1.4e-21	0.792945	91.1061
rs614987	A	C	0.0107556	0.00125938	1.3e-17	0.386434	72.9383
rs6919087	T	G	-0.0103817	0.00132307	4.3e-15	0.688011	61.5703
rs11125776	T	G	-0.0120412	0.00174757	5.6e-12	0.855818	47.4756
rs2769916	G	A	0.00877372	0.00132557	3.6e-11	0.311202	43.8089
rs8050478	G	A	-0.00763479	0.0012248	4.6e-10	0.499399	38.8565
rs34262487	C	A	-0.0146376	0.00236551	6.1e-10	0.927379	38.2904
rs1479116	G	A	0.00796453	0.00129506	7.8e-10	0.648882	37.8217
rs2033103	C	T	0.00753532	0.00123118	9.3e-10	0.549561	37.4594
rs72781017	A	G	-0.00756808	0.00124775	1.3e-09	0.597425	36.7889
rs10835420	T	A	-0.00857976	0.00141521	1.3e-09	0.751174	36.7543
rs12615434	C	T	0.0116344	0.00193313	1.8e-09	0.88691	36.2215
rs6483215	A	G	-0.00841794	0.00144207	5.3e-09	0.235887	34.0752
rs10840017	A	G	-0.00866558	0.00149279	6.4e-09	0.766777	33.6975
rs77154532	A	G	-0.00724236	0.00128118	1.6e-08	0.640496	31.9551
rs12992648	A	G	-0.00762551	0.00136135	2.1e-08	0.718467	31.376
rs350788	A	C	-0.00998241	0.00180127	3e-08	0.136278	30.7124
rs10757347	A	G	0.00810359	0.00147647	4.1e-08	0.777185	30.1235
rs11252681	G	A	0.016111	0.00293663	4.1e-08	0.954519	30.0986
rs971415	A	G	-0.0108343	0.00186482	6.3e-09	0.877284	33.7542
rs4402351	A	G	-0.0117649	0.00173327	1.1e-11	0.851931	46.0727
rs351776	A	C	0.00762604	0.00123034	5.7e-10	0.451957	38.4192

## Sheet: S2
Table S2. The SNPs used for replication MR analysis
Outcomes	SNP	REF	ALT	beta	se	P	eaf	F
UC-UK Biobank	rs13284688	T	C	0.0144228	0.00151104	1.4e-21	0.792945	91.1061
	rs614987	A	C	0.0107556	0.00125938	1.3e-17	0.386434	72.9383
	rs6919087	T	G	-0.0103817	0.00132307	4.3e-15	0.688011	61.5703
	rs11125776	T	G	-0.0120412	0.00174757	5.6e-12	0.855818	47.4756
	rs2769916	G	A	0.00877372	0.00132557	3.6e-11	0.311202	43.8089
	rs8050478	G	A	-0.00763479	0.0012248	4.6e-10	0.499399	38.8565
	rs1479116	G	A	0.00796453	0.00129506	7.8e-10	0.648882	37.8217
	rs2033103	C	T	0.00753532	0.00123118	9.3e-10	0.549561	37.4594
	rs72781017	A	G	-0.00756808	0.00124775	1.3e-09	0.597425	36.7889
	rs10835420	T	A	-0.00857976	0.00141521	1.3e-09	0.751174	36.7543
	rs6483215	A	G	-0.00841794	0.00144207	5.3e-09	0.235887	34.0752
	rs10840017	A	G	-0.00866558	0.00149279	6.4e-09	0.766777	33.6975
	rs77154532	A	G	-0.00724236	0.00128118	1.6e-08	0.640496	31.9551
	rs12992648	A	G	-0.00762551	0.00136135	2.1e-08	0.718467	31.376
	rs10757347	A	G	0.00810359	0.00147647	4.1e-08	0.777185	30.1235
	rs4402351	A	G	-0.0117649	0.00173327	1.1e-11	0.851931	46.0727
	rs351776	A	C	0.00762604	0.00123034	5.7e-10	0.451957	38.4192
	rs6665690	A	C	-0.00911555	0.00162828	2.2e-08	0.829353	31.3406
CD-UK Biobank	rs614987	A	C	0.0107556	0.00125938	1.3e-17	0.386434	72.9383
	rs6919087	T	G	-0.0103817	0.00132307	4.3e-15	0.688011	61.5703
	rs2769916	G	A	0.00877372	0.00132557	3.6e-11	0.311202	43.8089
	rs8050478	G	A	-0.00763479	0.0012248	4.6e-10	0.499399	38.8565
	rs1479116	G	A	0.00796453	0.00129506	7.8e-10	0.648882	37.8217
	rs2033103	C	T	0.00753532	0.00123118	9.3e-10	0.549561	37.4594
	rs72781017	A	G	-0.00756808	0.00124775	1.3e-09	0.597425	36.7889
	rs77154532	A	G	-0.00724236	0.00128118	1.6e-08	0.640496	31.9551
	rs12992648	A	G	-0.00762551	0.00136135	2.1e-08	0.718467	31.376
	rs351776	A	C	0.00762604	0.00123034	5.7e-10	0.451957	38.4192
